# Supplementary material
Source: PubMed Central journal article supplement (PMC8273144)
Supplement: NIHMS1706342-supplement-sm.pdf [file NIHMS1706342-supplement-sm.pdf]

Supplementary Figure 1. CONSORT statement for patient flow chart

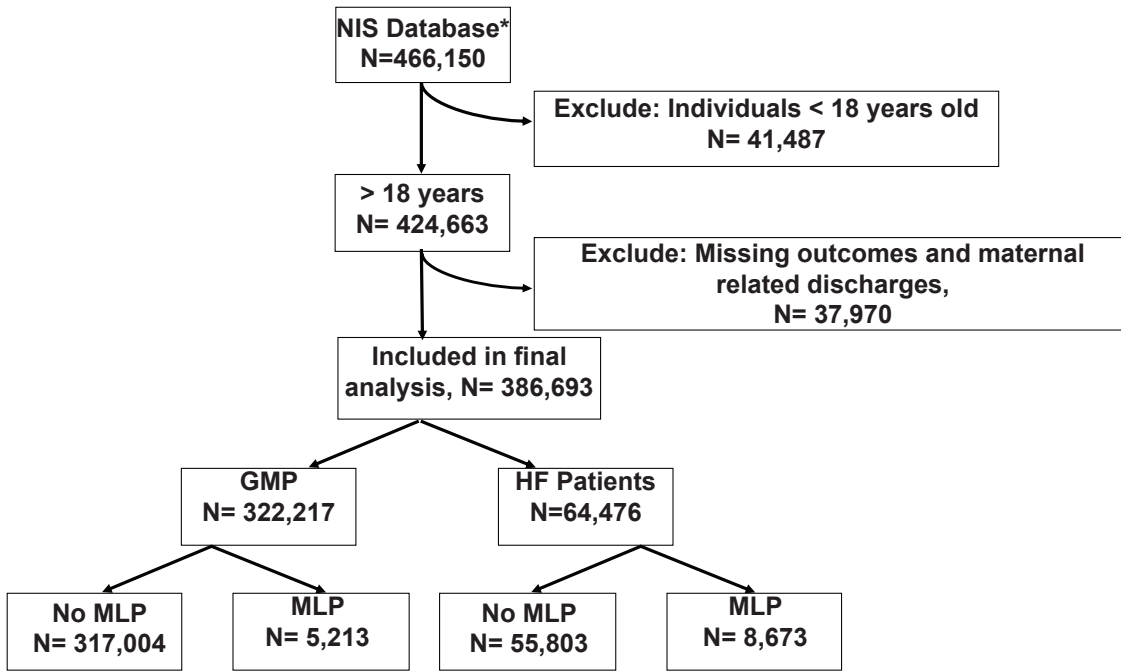

**Supplementary Figure 2. Race/ethnicity proportions among a random 2% inpatient sample of the general medicine population (GMP) and inpatient heart failure patients from the National Inpatient Sample database stratified by age group (50 years(y), 51-64y, and >65y of age quantified cumulatively from data in the years 2010-2014.**

- White
- Black
- Hispanic
- Other

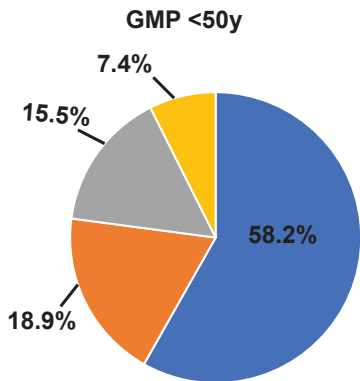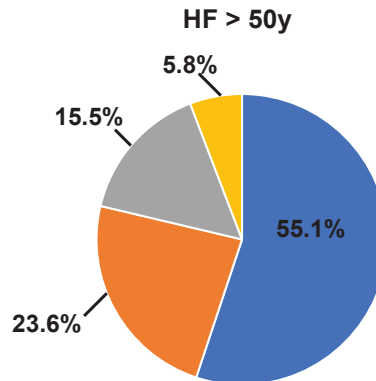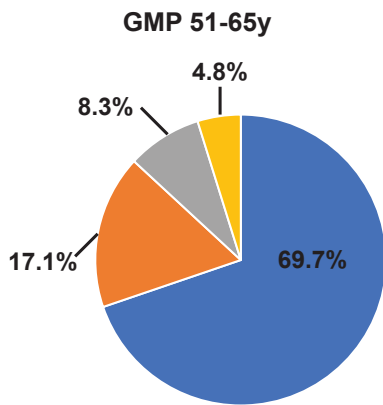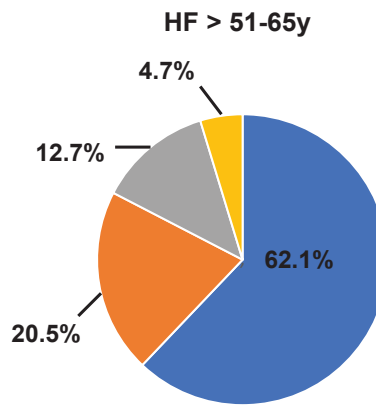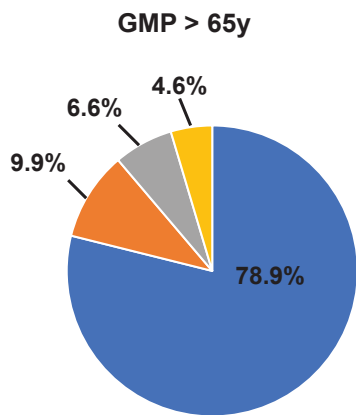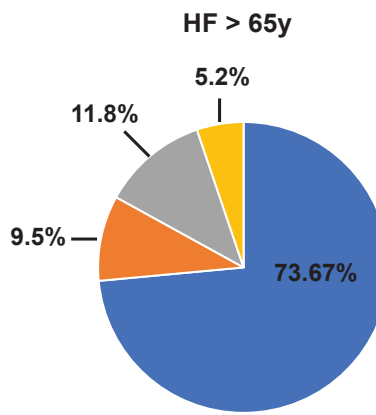

**Supplementary Fig 3A and B. Increasing proportion of older all inpatients with heart failure and older inpatients with heart failure with muscle loss phenotype.** (A) Line graphs depicting percentage of the analyzed random 2% inpatient sample of the general medical population (GMP) and hospitalized patients with heart failure (HF) from the National Inpatient Sample database each year from 2010-2014 who were <50 years(y), 50-64y, and >65y of age. (B) Line graphs depicting percentage of the analyzed inpatient sample of those GMP or HF with muscle loss phenotype each year from 2010-2014 who were <50y, 50-64y, and >65y of age.

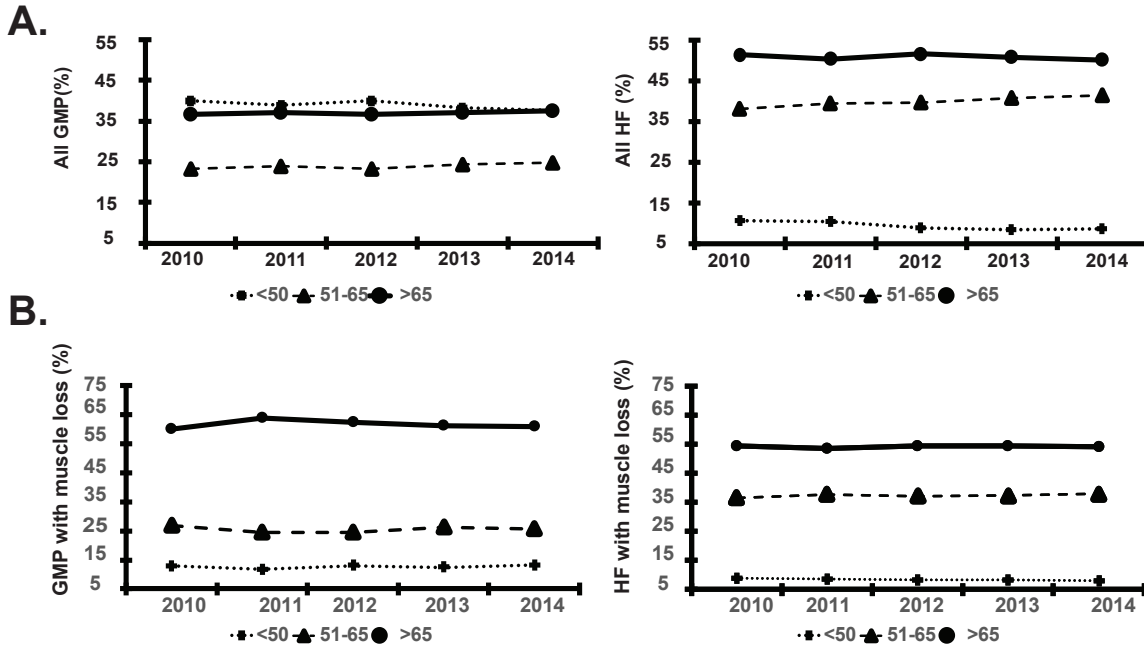

**Supplementary Table 1. Demographic characteristics for all hospitalized general medicine population and patients with heart failure, grouped by age regardless of muscle loss status.**

|                           | GMP                                         |                                              |                                             | HF                                               |                                                  |                                                  |
|---------------------------|---------------------------------------------|----------------------------------------------|---------------------------------------------|--------------------------------------------------|--------------------------------------------------|--------------------------------------------------|
| Age categories (years)    | ≤50                                         | 51-65                                        | >65                                         | ≤50                                              | 51-65                                            | >65                                              |
| Number of Patients        | 125,729                                     | 77,172                                       | 119,316                                     | 5935                                             | 25,824                                           | 32,717                                           |
| Female (%)                | 37,783 (30.1)                               | 38,892 (50.4)                                | 51,660 (43.3)                               | 3,572 (60.2) ***                                 | 16,137 (62.5) ***                                | 17,010 (52.0) ***                                |
| Age (mean (SD))           | 34.03 (9.35)                                | 58.01 (4.26)                                 | 77.73 (7.76)                                | 44.06 (6.21) ***                                 | 58.40 (4.15) ***                                 | 75.73 (6.92) ***                                 |
| Race (%)                  |                                             |                                              |                                             |                                                  |                                                  |                                                  |
| White                     | 73,135 (58.2)                               | 53,796 (69.7)                                | 94,192 (78.9)                               | 3,270 (55.1) ***                                 | 16,032 (62.1) ***                                | 24,081 (73.6) ***                                |
| Black                     | 23782 (18.9)                                | 13212 (17.1)                                 | 11828 (9.9)                                 | 1,402 (23.6) ***                                 | 5,299 (20.5) ***                                 | 3,093 (9.5) *                                    |
| Hispanic                  | 19,452 (15.5)                               | 6,439 (8.3)                                  | 7,851 (6.6)                                 | 917 (15.5)                                       | 3,275 (12.7) ***                                 | 3,853 (11.8) ***                                 |
| Other                     | 9,360 (7.4)                                 | 3,725 (4.8)                                  | 5,445 (4.6)                                 | 346 (5.8) ***                                    | 1,218 (4.7)                                      | 1,690 (5.2) ***                                  |
| LoS (mean(SD))            | 3.77 (5.45) <sup>cf</sup>                   | 4.90 (6.73) <sup>ci</sup>                    | 5.06 (6.03) <sup>fi</sup>                   | 8.75 (12.32) <sup>***cf</sup>                    | 8.13 (9.53) <sup>***ci</sup>                     | 7.69 (8.14) <sup>***fi</sup>                     |
| In-hospital mortality (%) | 576 (0.5) <sup>cf</sup>                     | 1,407 (1.8) <sup>ci</sup>                    | 3,972 (3.3) <sup>fi</sup>                   | 507 (8.5) <sup>***f</sup>                        | 2,289 (8.9) <sup>***i</sup>                      | 3,556 (10.9) <sup>***fi</sup>                    |
| CoH in USD (median (IQR)) | 4,739.00 [2,967.00, 8,307.00] <sup>cf</sup> | 8,115.00 [4,623.00, 14,572.00] <sup>ci</sup> | 7,833.00 [4633.75, 13,821.00] <sup>fi</sup> | 11,366.90 [6,155.50, 23,860.56] <sup>***cf</sup> | 10,831.15 [6,051.80, 21,400.06] <sup>***ci</sup> | 10,780.88 [6,222.63, 19,547.25] <sup>***fi</sup> |
| Muscle loss phenotype (%) | 659 (0.5) <sup>cf</sup>                     | 1336 (1.7) <sup>ci</sup>                     | 3218 (2.7) <sup>fi</sup>                    | 730 (12.3) <sup>***f</sup>                       | 3248 (12.6) <sup>***i</sup>                      | 4695 (14.4) <sup>***fi</sup>                     |

|                                              |                                 |                                |                                |                                      |                                      |                                      |
|----------------------------------------------|---------------------------------|--------------------------------|--------------------------------|--------------------------------------|--------------------------------------|--------------------------------------|
| Number of diagnoses on discharge (mean (SD)) | 6.62<br>(4.40) <sup>cf</sup>    | 9.98<br>(5.39) <sup>ci</sup>   | 11.63<br>(5.38) <sup>fi</sup>  | 18.04<br>(5.68) <sup>***cf</sup>     | 18.39<br>(5.53) <sup>ci</sup>        | 18.78<br>(5.45) <sup>fi</sup>        |
| Elixhauser score (mean (SD))                 | 0.62<br>(6.16) <sup>cf</sup>    | 3.14<br>(8.40) <sup>ci</sup>   | 5.33<br>(8.48) <sup>fi</sup>   | 21.77<br>(11.08)<br><sup>***cf</sup> | 22.35<br>(10.92)<br><sup>***ci</sup> | 24.27<br>(10.60)<br><sup>***fi</sup> |
| Comorbidities (%)                            |                                 |                                |                                |                                      |                                      |                                      |
| Acute kidney injury                          | 3,703<br>(2.9)                  | 7,404<br>(9.6)                 | 2,0349<br>(17.1)               | 1,866<br>(31.4) <sup>***</sup>       | 8,910<br>(34.5)<br><sup>***</sup>    | 13,523<br>(41.3) <sup>***</sup>      |
| Alcohol abuse                                | 6,757<br>(5.4) <sup>cf</sup>    | 5,660<br>(7.3) <sup>ci</sup>   | 2,290<br>(1.9) <sup>fi</sup>   | 2,043<br>(34.4) <sup>***cf</sup>     | 8,091<br>(31.3)<br><sup>***ci</sup>  | 4,867<br>(14.9) <sup>***fi</sup>     |
| Diabetes (uncomplicated)                     | 9,022<br>(7.2)                  | 17,940<br>(23.2)               | 30,142<br>(25.3)               | 1,418<br>(23.9) <sup>***</sup>       | 8,640<br>(33.5)<br><sup>***</sup>    | 12,434<br>(38.0) <sup>***</sup>      |
| Diabetes (complicated)                       | 2,211<br>(1.8)                  | 4,159<br>(5.4)                 | 5,593<br>(4.7)                 | 548 (9.2)<br><sup>***</sup>          | 3,369<br>(13.0)<br><sup>***</sup>    | 3,601<br>(11.0) <sup>***</sup>       |
| Hypertension                                 | 23,356<br>(18.6) <sup>cf</sup>  | 44,420<br>(57.6) <sup>ci</sup> | 83,794<br>(70.2) <sup>fi</sup> | 3,152<br>(53.1) <sup>***cf</sup>     | 16,016<br>(62.0) <sup>***ci</sup>    | 21,188<br>(64.8) <sup>***fi</sup>    |
| Home Discharge                               | 111,111<br>(88.8) <sup>cf</sup> | 54,140<br>(71.5) <sup>ci</sup> | 56,543<br>(49.1) <sup>fi</sup> | 3,400<br>(62.6) <sup>cf***</sup>     | 12,001<br>(51.1)<br><sup>ci***</sup> | 9,711<br>(33.4) <sup>fi***</sup>     |

Abbreviations: CoH: Cost of hospitalization per admission, GMP: general medical population, HF: heart failure, LoS: Length of stay, SD: Standard deviation, USD: US dollars.

GMP vs. HF between each age group: \* p <0.05, \*\* p <0.01, \*\*\* p <0.001.

Within disease group, ≤50 vs. 51-65: a: p<0.05; b: p<0.01; c: p<0.001

Within disease group, ≤50 vs. >65: d: p<0.05; e: p<0.01; f: p<0.001

Within disease group, 51-65 vs. >65: g: p<0.05; h: p<0.01; i: p<0.001

**Supplementary Table 2. Comorbidities, insurance type and geographic distribution of hospitalized general medical and heart failure patients regardless of muscle loss status stratified by age.**

| Age categories (years)                                 | GMP           |               |               | P value <sup>a</sup> | HF           |              |               | P value <sup>a</sup> |
|--------------------------------------------------------|---------------|---------------|---------------|----------------------|--------------|--------------|---------------|----------------------|
|                                                        | ≤50           | 51-65         | >65           |                      | ≤50          | 51-65        | >65           |                      |
| Number of patients                                     | 125,729       | 77,172        | 119,316       |                      | 5935         | 25,824       | 32,717        |                      |
| Comorbidities (%)                                      |               |               |               |                      |              |              |               |                      |
| Anemia                                                 | 5,611 (4.5)   | 753 (1.0)     | 1,632 (1.4)   | <0.001               | 2,241 (37.8) | 9,361 (36.2) | 12,133 (37.1) | <0.001               |
| Coagulopathy                                           | 3,710 (3.0)   | 4,102 (5.3)   | 6,373 (5.3)   | <0.001               | 1,964 (33.1) | 8,386 (32.5) | 9,589 (29.3)  | <0.001               |
| Depression                                             | 10,175 (8.1)  | 10,264 (13.3) | 12,985 (10.9) | <0.001               | 844 (14.2)   | 3,651 (14.1) | 3,487 (10.7)  | <0.001               |
| Drug abuse                                             | 9,623 (7.7)   | 3,448 (4.5)   | 612 (0.5)     | <0.001               | 872 (14.7)   | 2,358 (9.1)  | 421 (1.3)     | <0.001               |
| Hypothyroidism                                         | 5,410 (4.3)   | 7,960 (10.3)  | 20,410 (17.1) | <0.001               | 649 (10.9)   | 3,612 (14.0) | 7,103 (21.7)  | <0.001               |
| Lymphoma                                               | 333 (0.3)     | 569 (0.7)     | 1,425 (1.2)   | <0.001               | 31 (0.5)     | 215 (0.8)    | 466 (1.4)     | <0.001               |
| Metastatic cancer                                      | 1,014 (0.8)   | 2,479 (3.2)   | 3,570 (3.0)   | <0.001               | 53 (0.9)     | 390 (1.5)    | 812 (2.5)     | <0.001               |
| Peptic ulcer disease                                   | 15 (0.0)      | 24 (0.0)      | 50 (0.0)      | <0.001               | 6 (0.1)      | 19 (0.1)     | 25 (0.1)      | <0.001               |
| Solid tumors                                           | 641 (0.5)     | 1,833 (2.4)   | 3,711 (3.1)   | <0.001               | 72 (1.2)     | 775 (3.0)    | 1,366 (4.2)   | <0.001               |
| Disposition of patient upon discharge (%) <sup>†</sup> |               |               |               |                      |              |              |               |                      |
| Transfer to short-term hospital                        | 1,649 (1.3)   | 1,920 (2.5)   | 2,716 (2.4)   | <0.001               | 241 (4.4)    | 962 (4.1)    | 991 (3.4)     | <0.001               |
| Transfer other: SNF, ICF                               | 4,373 (3.5)   | 8,253 (10.9)  | 33,410 (29.0) |                      | 794 (14.6)   | 5,673 (24.1) | 11,220 (38.5) |                      |
| Home Health Care                                       | 5,599 (4.5)   | 10,350 (13.7) | 22,080 (19.2) |                      | 798 (14.7)   | 4,380 (18.6) | 7,038 (24.2)  |                      |
| Against medical advice                                 | 2,357 (1.9)   | 1,058 (1.4)   | 507 (0.4)     |                      | 194 (3.6)    | 491 (2.1)    | 153 (0.5)     |                      |
| Urban-rural classification for US county (%)           |               |               |               |                      |              |              |               |                      |
| Metro areas ≥ 1 million                                | 39,347 (31.3) | 22,161 (28.7) | 31,295 (26.2) | <0.001               | 2,168 (36.5) | 8,776 (34.0) | 9,829 (30.0)  | <0.001               |
| Metro areas of 250,000-999,999                         | 23,338 (18.6) | 14,237 (18.4) | 21,846 (18.3) |                      | 1,110 (18.7) | 4,833 (18.7) | 5,990 (18.3)  |                      |
| Metro areas of 50,000-249,999                          | 11,460 (9.1)  | 7,286 (9.4)   | 11,595 (9.7)  |                      | 535 (9.0)    | 2,506 (9.7)  | 3,111 (9.5)   |                      |
| Fringe counties of metro ≥ 1 million                   | 32,089 (25.5) | 19,444 (25.2) | 30,511 (25.6) |                      | 1,175 (19.8) | 5,512 (21.3) | 7,952 (24.3)  |                      |
| Micropolitan counties                                  | 11,763 (9.4)  | 8,238 (10.7)  | 13,890 (11.6) |                      | 572 (9.6)    | 2,449 (9.5)  | 3,322 (10.2)  |                      |
| Non-metro or micropolitan counties                     | 7,732 (6.1)   | 5,806 (7.5)   | 10,179 (8.5)  |                      | 375 (6.3)    | 1,748 (6.8)  | 2,513 (7.7)   |                      |
| Mean household income by zip code (%)                  |               |               |               |                      |              |              |               |                      |

|                                 |                  |                  |                   |            |                 |                  |                  |            |
|---------------------------------|------------------|------------------|-------------------|------------|-----------------|------------------|------------------|------------|
| 0-25th percentile               | 39,530<br>(31.4) | 24,164<br>(31.3) | 33,053<br>(27.7)  | <0.0<br>01 | 2,534<br>(42.7) | 10,400<br>(40.3) | 10,307<br>(31.5) | <0.0<br>01 |
| 26th to 50th percentile         | 31,749<br>(25.3) | 19,857<br>(25.7) | 31,243<br>(26.2)  |            | 1,573<br>(26.5) | 6,783<br>(26.3)  | 8,482<br>(25.9)  |            |
| 51st to 75th percentile         | 29,468<br>(23.4) | 17,915<br>(23.2) | 28,665<br>(24.0)  |            | 1,176<br>(19.8) | 5,334<br>(20.7)  | 7,582<br>(23.2)  |            |
| 76th to 100th percentile        | 24,982<br>(19.9) | 15,236<br>(19.7) | 26,355<br>(22.1)  |            | 652<br>(11.0)   | 3,307<br>(12.8)  | 6,346<br>(19.4)  |            |
| Primary payer for insurance (%) |                  |                  |                   | <0.0<br>01 |                 |                  |                  | <0.0<br>01 |
| Medicare                        | 10,920<br>(8.7)  | 21,353<br>(27.7) | 106,658<br>(89.4) |            | 1,960<br>(33.0) | 11,655<br>(45.1) | 29,420<br>(89.9) |            |
| Medicaid                        | 40,492<br>(32.2) | 11,350<br>(14.7) | 1,759<br>(1.5)    |            | 2,210<br>(37.2) | 6,516<br>(25.2)  | 632<br>(1.9)     |            |
| Private insurance               | 53,857<br>(42.8) | 34,592<br>(44.8) | 9,063<br>(7.6)    |            | 973<br>(16.4)   | 5,297<br>(20.5)  | 2,143<br>(6.6)   |            |
| Self-pay                        | 13,006<br>(10.3) | 5,421<br>(7.0)   | 563<br>(0.5)      |            | 520<br>(8.8)    | 1,317<br>(5.1)   | 140<br>(0.4)     |            |
| No pay                          | 1297<br>(1.0)    | 673<br>(0.9)     | 81 (0.1)          |            | 54 (0.9)        | 138<br>(0.5)     | 19 (0.1)         |            |
| Other                           | 6,157<br>(4.9)   | 3,783<br>(4.9)   | 1,192<br>(1.0)    |            | 218<br>(3.7)    | 901<br>(3.5)     | 363<br>(1.1)     |            |

<sup>†</sup>Routine discharge is included in the total percentage and is shown in the main tables

Abbreviations: GMP: General medical population, ICF: Intermediate care facility, SNF: Skilled nursing facility.

<sup>a</sup> p values that are marked represent ANOVA analyses.

GMP without muscle loss vs. heart failure without muscle loss, between each age group: \* p <0.05, \*\* p <0.01, \*\*\* p <0.001.

**Supplementary Table 3. Comorbidities, insurance type and geographic distribution of hospitalized general medical and heart failure patients with muscle loss stratified by age.**

| Age categories (years)                                 | GMP with muscle loss phenotype |            |              | P value <sup>a</sup> | HF with muscle loss phenotype |              |              | P value <sup>a</sup> |
|--------------------------------------------------------|--------------------------------|------------|--------------|----------------------|-------------------------------|--------------|--------------|----------------------|
|                                                        | ≤50                            | 51-65      | >65          |                      | ≤50                           | 51-65        | >65          |                      |
| Number of patients                                     | 659                            | 1,336      | 3,218        |                      | 730                           | 3,248        | 4,696        |                      |
| Comorbidities (%)                                      |                                |            |              |                      |                               |              |              |                      |
| Anemia                                                 | 18 (2.7)                       | 33 (2.5)   | 80 (2.5)     | 0.929                | 318 (43.6)                    | 1367 (42.1)  | 1,987 (42.3) | 0.767                |
| Coagulopathy                                           | 149 (22.6)                     | 296 (22.2) | 513 (15.9)   | <0.001               | 312 (42.7)                    | 1,278 (39.3) | 1,532 (32.6) | <0.001               |
| Depression                                             | 125 (19.0)                     | 250 (18.7) | 517 (16.1)   | 0.039                | 99 (13.6)                     | 406 (12.5)   | 492 (10.5)   | 0.004                |
| Drug abuse                                             | 88 (13.4)                      | 96 (7.2)   | 36 (1.1)     | <0.001               | 80 (11.0)                     | 262 (8.1)    | 73 (1.6)     | <0.001               |
| Hypothyroidism                                         | 56 (8.5)                       | 159 (11.9) | 687 (21.3)   | <0.001               | 84 (11.5)                     | 405 (12.5)   | 971 (20.7)   | <0.001               |
| Lymphoma                                               | 10 (1.5)                       | 21 (1.6)   | 75 (2.3)     | 0.154                | 5 (0.7)                       | 27 (0.8)     | 85 (1.8)     | <0.001               |
| Metastatic cancer                                      | 42 (6.4)                       | 154 (11.5) | 301 (9.4)    | 0.001                | 6 (0.8)                       | 102 (3.1)    | 207 (4.4)    | <0.001               |
| Peptic ulcer disease                                   | 1 (0.2)                        | 0 (0.0)    | 3 (0.1)      | 0.444                | 1 (0.1)                       | 3 (0.1)      | 2 (0.0)      | 0.544                |
| Solid tumors                                           | 12 (1.8)                       | 86 (6.4)   | 217 (6.7)    | <0.001               | 11 (1.5)                      | 102 (3.1)    | 251 (5.3)    | <0.001               |
| Disposition of patient upon discharge (%) <sup>†</sup> |                                |            |              |                      |                               |              |              |                      |
| Transfer to short-term hospital                        | 33 (5.3)                       | 60 (5.1)   | 77 (2.7)     | <0.001               | 44 (7.0)                      | 136 (4.9)    | 147 (3.8)    | <0.001               |
| Transfer other: SNF, ICF                               | 177 (28.6)                     | 461 (39.2) | 1,679 (59.1) |                      | 165 (26.3)                    | 1,081 (39.2) | 2,116 (54.6) |                      |
| Home Health Care                                       | 154 (24.9)                     | 286 (24.3) | 648 (22.8)   |                      | 129 (20.5)                    | 567 (20.6)   | 904 (23.3)   |                      |
| Against medical advice                                 | 10 (1.6)                       | 8 (0.7)    | 7 (0.2)      |                      | 16 (2.5)                      | 38 (1.4)     | 14 (0.4)     |                      |
| Urban-rural classification for US county (%)           |                                |            |              |                      |                               |              |              |                      |
| Metro areas ≥ 1 million                                | 214 (32.5)                     | 434 (32.5) | 1,062 (33.0) | 0.823 <sup>a</sup>   | 246 (33.7)                    | 1,045 (32.2) | 1,515 (32.3) | 0.02                 |
| Metro areas of 250,000-999,999                         | 106 (16.1)                     | 214 (16.0) | 556 (17.3)   |                      | 128 (17.5)                    | 656 (20.2)   | 809 (17.2)   |                      |
| Metro areas of 50,000-249,999                          | 57 (8.6)                       | 130 (9.7)  | 278 (8.6)    |                      | 87 (11.9)                     | 339 (10.4)   | 473 (10.1)   |                      |
| Fringe counties of metro ≥ 1 million                   | 162 (24.6)                     | 342 (25.6) | 830 (25.8)   |                      | 150 (20.5)                    | 686 (21.1)   | 1122 (23.9)  |                      |
| Micropolitan counties                                  | 74 (11.2)                      | 133 (10.0) | 301 (9.4)    |                      | 70 (9.6)                      | 305 (9.4)    | 435 (9.3)    |                      |
| Non-metro or micropolitan counties                     | 46 (7.0)                       | 83 (6.2)   | 191 (5.9)    |                      | 49 (6.7)                      | 217 (6.7)    | 341 (7.3)    |                      |
| Mean household income by zip code (%)                  |                                |            |              |                      |                               |              |              |                      |



|                                 |               |               |                 |            |               |                 |                 |            |
|---------------------------------|---------------|---------------|-----------------|------------|---------------|-----------------|-----------------|------------|
| 0-25th percentile               | 242<br>(36.7) | 453<br>(33.9) | 862<br>(26.8)   | <0.0<br>01 | 292<br>(40.0) | 1,250<br>(38.5) | 1,481<br>(31.5) | <0.0<br>01 |
| 26th to 50th percentile         | 170<br>(25.8) | 362<br>(27.1) | 797<br>(24.8)   |            | 203<br>(27.8) | 894<br>(27.5)   | 1,189<br>(25.3) |            |
| 51st to 75th percentile         | 149<br>(22.6) | 282<br>(21.1) | 838<br>(26.0)   |            | 145<br>(19.9) | 687<br>(21.2)   | 1,120<br>(23.9) |            |
| 76th to 100th percentile        | 98<br>(14.9)  | 239<br>(17.9) | 721<br>(22.4)   |            | 90<br>(12.3)  | 417<br>(12.8)   | 905<br>(19.3)   |            |
| Primary payer for insurance (%) |               |               |                 | <0.0<br>01 |               |                 |                 | <0.0<br>01 |
| Medicare                        | 176<br>(26.7) | 490<br>(36.7) | 2,894<br>(89.9) |            | 221<br>(30.3) | 1,466<br>(45.1) | 4,213<br>(89.7) |            |
| Medicaid                        | 202<br>(30.7) | 281<br>(21.0) | 51 (1.6)        |            | 261<br>(35.8) | 777<br>(23.9)   | 91 (1.9)        |            |
| Private insurance               | 198<br>(30.0) | 428<br>(32.0) | 231<br>(7.2)    |            | 141<br>(19.3) | 702<br>(21.6)   | 306<br>(6.5)    |            |
| Self-pay                        | 52 (7.9)      | 79 (5.9)      | 11 (0.3)        |            | 78<br>(10.7)  | 177<br>(5.4)    | 18 (0.4)        |            |
| No pay                          | 6 (0.9)       | 7 (0.5)       | 2 (0.1)         |            | 4 (0.5)       | 15 (0.5)        | 5 (0.1)         |            |
| Other                           | 25 (3.8)      | 51 (3.8)      | 29 (0.9)        |            | 25 (3.4)      | 111<br>(3.4)    | 62 (1.3)        |            |

†Routine discharge is included in the total percentage and is shown in the main tables

GMP: General medical population, ICF: Intermediate care facility, SNF: Skilled nursing facility.

<sup>a</sup>p values that are marked represent ANOVA analyses.

GMP with muscle loss vs heart failure patients with muscle loss, between each age group: \* p <0.05, \*\* p <0.01, \*\*\* p <0.001.

**Supplementary Table 4. Demographic characteristics of hospitalized general medicine patients with/without muscle loss phenotype grouped by age.**

|                                              | GMP without muscle loss phenotype         |                                            |                                             | GMP with muscle loss phenotype                    |                                                  |                                                  |
|----------------------------------------------|-------------------------------------------|--------------------------------------------|---------------------------------------------|---------------------------------------------------|--------------------------------------------------|--------------------------------------------------|
|                                              | ≤50                                       | 51-65                                      | >65                                         | ≤50                                               | 51-65                                            | >65                                              |
| Age categories in years                      |                                           |                                            |                                             |                                                   |                                                  |                                                  |
| Number of Patients                           | 125070                                    | 75836                                      | 116098                                      | 659                                               | 1336                                             | 3218                                             |
| Female (%)                                   | 37448 (29.9)                              | 38171 (50.3)                               | 50160 (43.2)                                | 335 (50.8) ***                                    | 721 (54.0) **                                    | 1,500 (46.6) **                                  |
| Age (mean (SD))                              | 34.00 (9.34)                              | 58.00 (4.26)                               | 77.71 (7.76)                                | 39.86 (8.50) ***                                  | 58.60 (4.21) ***                                 | 78.81 (7.77) ***                                 |
| Race (%)                                     |                                           |                                            |                                             |                                                   |                                                  |                                                  |
| White                                        | 72728 (58.1)                              | 52925 (69.8)                               | 91769 (79.0)                                | 407 (61.8)                                        | 871 (65.2) ***                                   | 2,423 (75.3) ***                                 |
| Black                                        | 23643 (18.9)                              | 12913 (17.0)                               | 11414 (9.8)                                 | 139 (21.1)                                        | 299 (22.4) ***                                   | 414 (12.9) ***                                   |
| Hispanic                                     | 19386 (15.5)                              | 6338 (8.4)                                 | 7648 (6.6)                                  | 66 (10.0) ***                                     | 101 (7.6)                                        | 203 (6.3) ***                                    |
| Other                                        | 9313 (7.4)                                | 3660 (4.8)                                 | 5267 (4.5)                                  | 47 (7.1)                                          | 65 (4.9)                                         | 178 (5.5)                                        |
| LoS (mean [SD])                              | 3.70 (5.16) <sup>cf</sup>                 | 4.73 (6.30) <sub>ci</sub>                  | 4.91 (5.80) <sub>fi</sub>                   | 12.00 [6.00, 22.00] <sup>***cf</sup>              | 9.50 [5.00, 17.00] <sup>***ci</sup>              | 8.00 [5.00, 13.00] <sup>***fi</sup>              |
| In-hospital mortality (%)                    | 536 (0.4) <sup>cf</sup>                   | 1250 (1.6) <sub>ci</sub>                   | 3600 (3.1) <sub>fi</sub>                    | 40 (6.1) <sup>***cf</sup>                         | 157 (11.8) <sup>***c</sup>                       | 372 (11.6) <sup>***f</sup>                       |
| Cost of hospitalization (median (IQR))       | 4720.00 [2,958.00, 8227.00] <sup>cf</sup> | 8014.00 [4,590.00, 14344.00] <sub>ci</sub> | 7719.50 [4,587.00, 13,567.00] <sub>fi</sub> | 25,329.00 [11,846.00, 56,083.00] <sup>***cf</sup> | 18,619.50 [9,905.25, 40,824.00] <sup>***ci</sup> | 14,088.00 [7,925.25, 26,901.25] <sup>***fi</sup> |
| Number of diagnoses on discharge (mean (SD)) | 6.54 (4.28) <sup>cf</sup>                 | 9.78 (5.20) <sub>ci</sub>                  | 11.37 (5.18) <sub>fi</sub>                  | 21.15 (3.77) ***                                  | 21.28 (3.73) ***                                 | 21.07 (3.46) ***                                 |
| Elixhauser score (mean (SD))                 | 0.52 (5.98) <sup>cf</sup>                 | 2.85 (8.05) <sub>ci</sub>                  | 4.93 (8.07) <sub>fi</sub>                   | 18.72 (10.63) <sup>***d</sup>                     | 19.86 (10.89) ***                                | 19.82 (10.25) <sup>***d</sup>                    |
| Comorbidities (%)                            |                                           |                                            |                                             |                                                   |                                                  |                                                  |
| Acute kidney injury                          | 3579 (2.9)                                | 7118 (9.4)                                 | 19383 (16.7)                                | 124 (18.8) ***                                    | 286 (21.4) ***                                   | 966 (30.0) ***                                   |

|                             |                                |                               |                               |                                 |                                |                                 |
|-----------------------------|--------------------------------|-------------------------------|-------------------------------|---------------------------------|--------------------------------|---------------------------------|
| Alcohol abuse               | 6666 (5.3)<br>cf               | 5456 (7.2)<br>ci              | 2156 (1.9)<br>fi              | 91 (13.8)<br>***f               | 204 (15.3)<br>***i             | 134 (4.2)<br>***fi              |
| Diabetes<br>(uncomplicated) | 8921 (7.1)<br>cf               | 17659<br>(23.3) ci            | 29351<br>(25.3) fi            | 101 (15.3)<br>***af             | 281 (21.0)<br>ag               | 791 (24.6)<br>fg                |
| Diabetes<br>(complicated)   | 2152 (1.7)<br>cf               | 4016 (5.3)<br>ci              | 5380 (4.6)<br>fi              | 59 (9.0) ***                    | 143 (10.7)<br>***i             | 213 (6.6)<br>***i               |
| Hypertension                | 23114<br>(18.5) <sup>cf</sup>  | 43682<br>(57.6) <sup>ci</sup> | 81609<br>(70.3) <sup>fi</sup> | 242 (36.7)<br>*** <sup>cf</sup> | 738 (55.2) <sup>ci</sup>       | 2,185<br>(67.9) <sup>**fi</sup> |
| Home<br>Discharge           | 110866<br>(89.1) <sup>cf</sup> | 53779<br>(72.1) <sup>ci</sup> | 56112<br>(49.9) <sup>fi</sup> | 245 (39.6)<br><sup>cf***</sup>  | 361 (30.7)<br><sup>ci***</sup> | 431 (15.2)<br><sup>fi***</sup>  |

Abbreviations: CoH: Cost of hospitalization, GMP: General medical population, LoS: Length of stay, SD: Standard deviation, USD: US dollars.

GMP without muscle loss vs GMP with muscle loss phenotype, between each age group: \* p <0.05, \*\* p <0.01, \*\*\* p <0.001.

Within phenotype group, ≤50 vs. 51-65: a: p<0.05; b: p<0.01; c: p<0.001.

Within phenotype group, ≤50 vs. >65: d: p<0.05; e: p<0.01; f: p<0.001.

Within phenotype group, 51-65 vs. >65: g: p<0.05; h: p<0.01; i: p<0.001

**Supplementary table 5. Comorbidities, insurance type and geographic distribution of general medical patients with and without muscle loss phenotype stratified by age.**

| Age categories (years)                                 | GMP without muscle loss phenotype |              |              | P value <sup>a</sup> | GMP with muscle loss phenotype |            |              | P value <sup>a</sup> |
|--------------------------------------------------------|-----------------------------------|--------------|--------------|----------------------|--------------------------------|------------|--------------|----------------------|
|                                                        | ≤50                               | 51-65        | >65          |                      | ≤50                            | 51-65      | >65          |                      |
| Number of patients                                     | 125070                            | 75836        | 116098       |                      | 659                            | 1336       | 3218         |                      |
| Comorbidities (%)                                      |                                   |              |              |                      |                                |            |              |                      |
| Anemia                                                 | 5593 (4.5)                        | 720 (0.9)    | 1552 (1.3)   | <0.001               | 18 (2.7)                       | 33 (2.5)   | 80 (2.5)     | 0.929                |
| Coagulopathy                                           | 3561 (2.8)                        | 3806 (5.0)   | 5860 (5.0)   | <0.001               | 149 (22.6)                     | 296 (22.2) | 513 (15.9)   | <0.001               |
| Depression                                             | 10050 (8.0)                       | 10014 (13.2) | 12468 (10.7) | <0.001               | 125 (19.0)                     | 250 (18.7) | 517 (16.1)   | 0.039                |
| Drug abuse                                             | 9535 (7.6)                        | 3352 (4.4)   | 576 (0.5)    | <0.001               | 88 (13.4)                      | 96 (7.2)   | 36 (1.1)     | <0.001               |
| Hypothyroidism                                         | 5354 (4.3)                        | 7801 (10.3)  | 19723 (17.0) | <0.001               | 242 (36.7)                     | 738 (55.2) | 2,185 (67.9) | <0.001               |
| Lymphoma                                               | 323 (0.3)                         | 548 (0.7)    | 1350 (1.2)   | <0.001               | 56 (8.5)                       | 159 (11.9) | 687 (21.3)   | 0.154                |
| Metastatic cancer                                      | 972 (0.8)                         | 2325 (3.1)   | 3269 (2.8)   | <0.001               | 10 (1.5)                       | 21 (1.6)   | 75 (2.3)     | 0.001                |
| Peptic ulcer disease                                   | 14 (0.0)                          | 24 (0.0)     | 47 (0.0)     | <0.001               | 1 (0.2)                        | 0 (0.0)    | 3 (0.1)      | 0.444                |
| Solid tumors                                           | 629 (0.5)                         | 1747 (2.3)   | 3494 (3.0)   | <0.001               | 12 (1.8)                       | 86 (6.4)   | 217 (6.7)    | <0.001               |
| Disposition of patient upon discharge (%) <sup>†</sup> |                                   |              |              |                      |                                |            |              |                      |
| Transfer to short-term hospital                        | 1616 (1.3)                        | 1860 (2.5)   | 2639 (2.3)   | <0.001               | 33 (5.3)                       | 60 (5.1)   | 77 (2.7)     | <0.001               |
| Transfer other: SNF, ICF                               | 4196 (3.4)                        | 7792 (10.5)  | 31731 (28.2) |                      | 177 (28.6)                     | 461 (39.2) | 1,679 (59.1) |                      |
| Home Health Care                                       | 5445 (4.4)                        | 10064 (13.5) | 21432 (19.1) |                      | 154 (24.9)                     | 286 (24.3) | 648 (22.8)   |                      |
| Against medical advice                                 | 2347 (1.9)                        | 1050 (1.4)   | 500 (0.4)    |                      | 10 (1.6)                       | 8 (0.7)    | 7 (0.2)      |                      |
| Urban-rural classification for US county (%)           |                                   |              |              |                      |                                |            |              |                      |
| Metro areas ≥ 1 million                                | 39133 (31.3)                      | 21727 (28.6) | 30233 (26.0) | <0.001               | 214 (32.5)                     | 434 (32.5) | 1,062 (33.0) | 0.823                |
| Metro areas of 250,000-999,999                         | 23232 (18.6)                      | 14023 (18.5) | 21290 (18.3) |                      | 106 (16.1)                     | 214 (16.0) | 556 (17.3)   |                      |
| Metro areas of 50,000-249,999                          | 11403 (9.1)                       | 7156 (9.4)   | 11317 (9.7)  |                      | 57 (8.6)                       | 130 (9.7)  | 278 (8.6)    |                      |
| Fringe counties of metro ≥ 1 million                   | 31927 (25.5)                      | 19102 (25.2) | 29681 (25.6) |                      | 162 (24.6)                     | 342 (25.6) | 830 (25.8)   |                      |
| Micropolitan counties                                  | 11689 (9.3)                       | 8105 (10.7)  | 13589 (11.7) |                      | 74 (11.2)                      | 133 (10.0) | 301 (9.4)    |                      |

|                                       |                 |                 |                  |            |               |               |                 |            |
|---------------------------------------|-----------------|-----------------|------------------|------------|---------------|---------------|-----------------|------------|
| Non-metro or micropolitan counties    | 7686<br>(6.1)   | 5723<br>(7.5)   | 9988<br>(8.6)    |            | 46 (7.0)      | 83 (6.2)      | 191<br>(5.9)    |            |
| Mean household income by zip code (%) |                 |                 |                  |            |               |               |                 |            |
| 0-25th percentile                     | 39288<br>(31.4) | 23711<br>(31.3) | 32191<br>(27.7)  | <0.0<br>01 | 242<br>(36.7) | 453<br>(33.9) | 862<br>(26.8)   | <0.0<br>01 |
| 26th to 50th percentile               | 31579<br>(25.2) | 19495<br>(25.7) | 30446<br>(26.2)  |            | 170<br>(25.8) | 362<br>(27.1) | 797<br>(24.8)   |            |
| 51st to 75th percentile               | 29319<br>(23.4) | 17633<br>(23.3) | 27827<br>(24.0)  |            | 149<br>(22.6) | 282<br>(21.1) | 838<br>(26.0)   |            |
| 76th to 100th percentile              | 24884<br>(19.9) | 14997<br>(19.8) | 25634<br>(22.1)  |            | 98<br>(14.9)  | 239<br>(17.9) | 721<br>(22.4)   |            |
| Primary payer for insurance (%)       |                 |                 |                  |            |               |               |                 |            |
| Medicare                              | 10744<br>(8.6)  | 20863<br>(27.5) | 103764<br>(89.4) | <0.0<br>01 | 176<br>(26.7) | 490<br>(36.7) | 2,894<br>(89.9) | <0.0<br>01 |
| Medicaid                              | 40290<br>(32.2) | 11069<br>(14.6) | 1708<br>(1.5)    |            | 202<br>(30.7) | 281<br>(21.0) | 51 (1.6)        |            |
| Private insurance                     | 53659<br>(42.9) | 34164<br>(45.0) | 8832<br>(7.6)    |            | 198<br>(30.0) | 428<br>(32.0) | 231<br>(7.2)    |            |
| Self-pay                              | 12954<br>(10.4) | 5342<br>(7.0)   | 552<br>(0.5)     |            | 52 (7.9)      | 79 (5.9)      | 11 (0.3)        |            |
| No pay                                | 1291<br>(1.0)   | 666<br>(0.9)    | 79 (0.1)         |            | 6 (0.9)       | 7 (0.5)       | 2 (0.1)         |            |
| Other                                 | 6132<br>(4.9)   | 3732<br>(4.9)   | 1163<br>(1.0)    |            | 25 (3.8)      | 51 (3.8)      | 29 (0.9)        |            |

†Routine discharge is included in the total percentage and is shown in the main tables

Abbreviations: GMP: General medical population, ICF: Intermediate care facility, SNF: Skilled nursing facility. <sup>a</sup> p values that are marked represent ANOVA analyses. GMP without muscle loss vs GMP with muscle loss, between each age group: \* p <0.05, \*\* p <0.01, \*\*\* p <0.001.

**Supplementary table 6. Comorbidities, insurance type and geographic distribution of hospitalized heart failure patients with and without muscle loss phenotype stratified by age.**

| Age categories (years)                                 | HF without muscle loss phenotype |              |               | P value <sup>a</sup> | HF with muscle loss phenotype |              |              | P value <sup>a</sup> |
|--------------------------------------------------------|----------------------------------|--------------|---------------|----------------------|-------------------------------|--------------|--------------|----------------------|
|                                                        | ≤50                              | 51-65        | >65           |                      | ≤50                           | 51-65        | >65          |                      |
| Number of patients                                     | 5,205                            | 22,576       | 22,022        |                      | 730                           | 3,248        | 4,695        |                      |
| Comorbidities (%)                                      |                                  |              |               |                      |                               |              |              |                      |
| Anemia                                                 | 1,923 (36.9)                     | 7,994 (35.4) | 10,146 (36.2) | 0.052                | 318 (43.6)                    | 1,367 (42.1) | 1,987 (42.3) | 0.767                |
| Coagulopathy                                           | 1,652 (31.7)                     | 7,108 (31.5) | 8,057 (28.8)  | <0.001               | 312 (42.7)                    | 1,278 (39.3) | 1,532 (32.6) | <0.001               |
| Depression                                             | 745 (14.3)                       | 3,245 (14.4) | 2,995 (10.7)  | <0.001               | 99 (13.6)                     | 406 (12.5)   | 492 (10.5)   | 0.004                |
| Drug abuse                                             | 792 (15.2)                       | 2,096 (9.3)  | 348 (1.2)     | <0.001               | 80 (11.0)                     | 262 (8.1)    | 73 (1.6)     | <0.001               |
| Hypothyroidism                                         | 565 (10.9)                       | 3,207 (14.2) | 6,132 (21.9)  | <0.001               | 84 (11.5)                     | 405 (12.5)   | 971 (20.7)   | <0.001               |
| Lymphoma                                               | 26 (0.5)                         | 188 (0.8)    | 381 (1.4)     | <0.001               | 5 (0.7)                       | 27 (0.8)     | 85 (1.8)     | <0.001               |
| Metastatic cancer                                      | 47 (0.9)                         | 288 (1.3)    | 605 (2.2)     | <0.001               | 6 (0.8)                       | 102 (3.1)    | 207 (4.4)    | <0.001               |
| Peptic ulcer disease                                   | 5 (0.1)                          | 16 (0.1)     | 23 (0.1)      | 0.813                | 1 (0.1)                       | 3 (0.1)      | 2 (0.0)      | 0.544                |
| Solid tumors                                           | 61 (1.2)                         | 673 (3.0)    | 1,115 (4.0)   | <0.001               | 11 (1.5)                      | 102 (3.1)    | 251 (5.3)    | <0.001               |
| Disposition of patient upon discharge (%) <sup>†</sup> |                                  |              |               |                      |                               |              |              |                      |
| Transfer to short-term hospital                        | 197 (4.1)                        | 826 (4.0)    | 844 (3.3)     | <0.001               | 44 (7.0)                      | 136 (4.9)    | 147 (3.8)    | <0.001               |
| Transfer other: SNF, ICF                               | 629 (13.1)                       | 4,592 (22.1) | 9104 (36.1)   |                      | 165 (26.3)                    | 1,081 (39.2) | 2,116 (54.6) |                      |
| Home Health Care                                       | 669 (13.9)                       | 3,813 (18.4) | 6,134 (24.3)  |                      | 129 (20.5)                    | 567 (20.6)   | 904 (23.3)   |                      |
| Against medical advice                                 | 178 (3.7)                        | 453 (2.2)    | 139 (0.6)     |                      | 16 (2.5)                      | 38 (1.4)     | 14 (0.4)     |                      |
| Urban-rural classification for US county (%)           |                                  |              |               |                      |                               |              |              |                      |
| Metro areas ≥ 1 million                                | 1,922 (36.9)                     | 7,731 (34.2) | 8,314 (29.7)  | <0.001               | 246 (33.7)                    | 1,045 (32.2) | 1,515 (32.3) | 0.02 <sup>a</sup>    |
| Metro areas of 250,000-999,999                         | 982 (18.9)                       | 4,177 (18.5) | 5,181 (18.5)  |                      | 128 (17.5)                    | 656 (20.2)   | 809 (17.2)   |                      |
| Metro areas of 50,000-249,999                          | 448 (8.6)                        | 2,167 (9.6)  | 2,638 (9.4)   |                      | 87 (11.9)                     | 339 (10.4)   | 473 (10.1)   |                      |
| Fringe counties of metro ≥ 1 million                   | 1,025 (19.7)                     | 4,826 (21.4) | 6,830 (24.4)  |                      | 150 (20.5)                    | 686 (21.1)   | 1,122 (23.9) |                      |
| Micropolitan counties                                  | 502 (9.6)                        | 2,144 (9.5)  | 2,887 (10.3)  |                      | 70 (9.6)                      | 305 (9.4)    | 435 (9.3)    |                      |

|                                       |                 |                  |                  |            |               |                 |                 |            |
|---------------------------------------|-----------------|------------------|------------------|------------|---------------|-----------------|-----------------|------------|
| Non-metro or micropolitan counties    | 326<br>(6.3)    | 1,531<br>(6.8)   | 2,172<br>(7.8)   |            | 49 (6.7)      | 217<br>(6.7)    | 341<br>(7.3)    |            |
| Mean household income by zip code (%) |                 |                  |                  |            |               |                 |                 |            |
| 0-25th percentile                     | 2,242<br>(43.1) | 9,150<br>(40.5)  | 8,826<br>(31.5)  | <0.0<br>01 | 292<br>(40.0) | 1,250<br>(38.5) | 1,481<br>(31.5) | <0.0<br>01 |
| 26th to 50th percentile               | 1,370<br>(26.3) | 5,889<br>(26.1)  | 7,293<br>(26.0)  |            | 203<br>(27.8) | 894<br>(27.5)   | 1,189<br>(25.3) |            |
| 51st to 75th percentile               | 1,031<br>(19.8) | 4,647<br>(20.6)  | 6,462<br>(23.1)  |            | 145<br>(19.9) | 687<br>(21.2)   | 1,120<br>(23.9) |            |
| 76th to 100th percentile              | 562<br>(10.8)   | 2,890<br>(12.8)  | 5,441<br>(19.4)  |            | 90<br>(12.3)  | 417<br>(12.8)   | 905<br>(19.3)   |            |
| Primary payer for insurance (%)       |                 |                  |                  |            |               |                 |                 |            |
| Medicare                              | 1,739<br>(33.4) | 10,189<br>(45.1) | 25,207<br>(90.0) | <0.0<br>01 | 221<br>(30.3) | 1,466<br>(45.1) | 4,213<br>(89.7) | <0.0<br>01 |
| Medicaid                              | 1,949<br>(37.4) | 5,739<br>(25.4)  | 541<br>(1.9)     |            | 261<br>(35.8) | 777<br>(23.9)   | 91 (1.9)        |            |
| Private insurance                     | 832<br>(16.0)   | 4,595<br>(20.4)  | 1,837<br>(6.6)   |            | 141<br>(19.3) | 702<br>(21.6)   | 306<br>(6.5)    |            |
| Self-pay                              | 442<br>(8.5)    | 1,140<br>(5.0)   | 122<br>(0.4)     |            | 78<br>(10.7)  | 177<br>(5.4)    | 18 (0.4)        |            |
| No pay                                | 50 (1.0)        | 123<br>(0.5)     | 14 (0.0)         |            | 4 (0.5)       | 15 (0.5)        | 5 (0.1)         |            |
| Other                                 | 193<br>(3.7)    | 790<br>(3.5)     | 301<br>(1.1)     |            | 25 (3.4)      | 111<br>(3.4)    | 62 (1.3)        |            |

†Routine discharge is included in the total percentage and is shown in the main tables

Abbreviations: ICF: Intermediate care facility, SNF: Skilled nursing facility.

<sup>a</sup> p values that are marked represent ANOVA analyses. HF without muscle loss vs HF with muscle loss, between each age group: \* p <0.05, \*\* p <0.01, \*\*\* p <0.001.

**Supplementary Table 7. Linear regression analysis for hospitalized general medicine and HF patients with Elixhauser comorbidity score as the dependent variable.**

|                                       | Heart Failure Elixhauser comorbidity score unadjusted (95% CI) | Heart Failure Elixhauser comorbidity score <b>adjusted</b> (95% CI) | GMP Elixhauser comorbidity score unadjusted (95% CI) | GMP Elixhauser comorbidity score <b>adjusted</b> (95% CI) |
|---------------------------------------|----------------------------------------------------------------|---------------------------------------------------------------------|------------------------------------------------------|-----------------------------------------------------------|
| Age category 51-65y (compared to ≤50) | 0.56 (0.27-0.84)                                               | 0.32 (0.08-0.55)                                                    | 2.32 (2.25-2.38)                                     | 0.87 (0.82-0.92)                                          |
| Age category >65y (compared to ≤50)   | 2.29 (2.01-2.57)                                               | 1.89 (1.66-2.12)                                                    | 4.38 (4.32-4.44)                                     | 2.37 (2.32-2.42)                                          |
| Muscle loss phenotype (%)             | 10.41 (10.18-10.64)                                            | 9.24 (9.07-9.41)                                                    | 15.73 (15.53-15.92)                                  | 11.47 (11.31-11.62)                                       |

**Linear regression analysis comparing hospitalized general medicine and HF patients across age strata with Elixhauser comorbidity score as the dependent variable.**

|                 | CHF vs GMP Elixhauser comorbidity score unadjusted (95% CI) | CHF vs GMP Elixhauser comorbidity score adjusted (95% CI) |
|-----------------|-------------------------------------------------------------|-----------------------------------------------------------|
| Age Group ≤50   | 3.74 (3.72-3.75)                                            | 3.64 (3.61-3.67)                                          |
| Age Group 51-65 | 3.77 (3.76-3.78)                                            | 3.65 (3.64-3.67)                                          |
| Age Group >65   | 3.77 (3.76-3.78)                                            | 3.67 (3.66-3.69)                                          |



**Supplementary Table 8. Regression analysis for hospitalized general medicine and heart failure patients with muscle loss phenotype.**

|                       | CHF vs GMP age 66-75      |                          | CHF vs GMP age >75        |                          |
|-----------------------|---------------------------|--------------------------|---------------------------|--------------------------|
|                       | Unadjusted OR<br>(95% CI) | Adjusted* OR<br>(95% CI) | Unadjusted OR<br>(95% CI) | Adjusted* OR<br>(95% CI) |
| CoH                   | 0.96 (0.90-1.03)          | <b>1.14 (1.12-1.16)</b>  | <b>1.11 (1.05-1.17)</b>   | <b>1.26 (1.24-1.28)</b>  |
| In-hospital mortality | <b>1.46 (1.19-1.80)</b>   | <b>1.66 (1.31-2.11)</b>  | <b>1.74 (1.47-2.07)</b>   | <b>1.96 (1.62-2.38)</b>  |
| LoS                   | 0.95 (0.90-1.00)          | <b>1.25 (1.23-1.26)</b>  | 1.04 (1.00-1.09)          | <b>1.25 (1.23-1.27)</b>  |
| Elixhauser            | <b>1.26 (1.25-1.28)</b>   | <b>1.26 (1.24-1.28)</b>  | <b>1.32 (1.31-1.34)</b>   | <b>1.29 (1.27-1.30)</b>  |

Bold text indicates significant differences. Abbreviations: CI: Confidence interval; CoH: Cost of hospitalization per admission; GMP: General medical population; LoS: Length of stay; OR: Odds ratio.

\* Adjusted for sex, race, and comorbidities (acute kidney injury, congestive heart failure, anemia, chronic lung disease, alcohol abuse, coagulopathy, metastatic cancer, cancer with solid tumors, diabetes [uncomplicated], diabetes [complicated])

**Supplementary Table 9. Sub analysis of patients with Systolic Heart Failure versus Diastolic Heart Failure; comorbidities, insurance type and geographic distribution of hospitalized heart failure patients with and without muscle loss phenotype stratified by age.**

|                                              | Systolic Heart Failure           | Diastolic Heart Failure            | p-value |
|----------------------------------------------|----------------------------------|------------------------------------|---------|
| Number of Patients                           | 843                              | 881                                |         |
| Female (%)                                   | 258 (30.6)                       | 468 (53.1)                         | <0.001  |
| Age (mean (SD))                              | 66.7 (12.2)                      | 68.6 (12.2)                        | 0.001   |
| Race (%)                                     |                                  |                                    | N/A     |
| White                                        | 315 (64.7)                       | 396 (78.4)                         |         |
| Black                                        | 90 (18.5)                        | 39 (7.7)                           |         |
| Hispanic                                     | 55 (11.3)                        | 37 (7.3)                           |         |
| Other                                        | 27 (5.5)                         | 33 (6.5)                           |         |
| LoS (mean(SD))                               | 14.23 (12.72)                    | 15.05 (14.24)                      | 0.207   |
| In-hospital mortality (%)                    | 184 (21.8)                       | 156 (17.7)                         | 0.037   |
| CoH in USD (median (IQR))                    | 10,231.16<br>(6081.90,21,800.06) | 10,325.88 (6,820.83,<br>18,326.25) | 0.823   |
| Number of diagnoses on discharge (mean (SD)) | 21.11 (5.19)                     | 21.06 (5.20)                       | 0.871   |
| Elixhauser score (mean (SD))                 | 30.22 (8.20)                     | 30.10 (8.29)                       | 0.862   |
| Comorbidities (%)                            |                                  |                                    |         |
| Acute kidney injury                          | 308 ( 35.0)                      | 302 ( 35.8)                        | 0.745   |
| Alcohol abuse                                | 210 (24.9)                       | 198 (22.5)                         | 0.257   |
| Diabetes (uncomplicated)                     | 170 (20.2)                       | 191 (21.7)                         | 0.476   |
| Diabetes (complicated)                       | 104 (12.3)                       | 100 (11.4)                         | 0.576   |
| Hypertension                                 | 410 (48.6)                       | 458 (52.0)                         | 0.179   |
| Home Discharge                               | 80 (19.9)                        | 78 (17.7)                          | 0.809   |

†Routine discharge is included in the total percentage and is shown in the main tables

Abbreviations: ICF: Intermediate care facility, SNF: Skilled nursing facility.

<sup>a</sup> p values that are marked represent ANOVA analyses. HF without muscle loss vs HF with muscle loss, between each age group: \* p <0.05, \*\* p <0.01, \*\*\* p <0.001.

**Supplementary Table 10. Regression analysis for hospitalized general medicine and heart failure patients with muscle loss phenotype comparing systolic versus diastolic heart failure.**

|                       | Systolic vs Diastolic HF age ≤50 |                       | Systolic vs Diastolic HF age 51-65 |                       | Systolic vs Diastolic age >65 |                         |
|-----------------------|----------------------------------|-----------------------|------------------------------------|-----------------------|-------------------------------|-------------------------|
|                       | Unadjusted OR (95% CI)           | Adjusted* OR (95% CI) | Unadjusted OR (95% CI)             | Adjusted* OR (95% CI) | Unadjusted OR (95% CI)        | Adjusted* OR (95% CI)   |
| CoH                   | 1.22 (0.89-1.68)                 | 1.22 (0.82-1.81)      | 1.10 (0.94-1.28)                   | 1.21 (0.97-1.52)      | 0.92 (0.81-1.05)              | 0.97 (0.82-1.15)        |
| In-hospital mortality | 1.25 (0.50-3.26)                 | 0.69 (0.14-3.74)      | 1.05 90.99-1.11)                   | 1.47 (0.83-2.67)      | 1.04 (0.99-1.10)              | <b>1.09 (1.02-1.17)</b> |
| LoS                   | 0.99 (0.77-1.27)                 | 0.90 (0.66-1.22)      | 0.99 (0.89-1.11)                   | 0.98 (0.83-1.15)      | 0.88 (0.80-0.96)              | 0.91 (0.80-1.03)        |
| Elixhauser score      | 1.10 (0.96-1.27)                 | 0.97 (0.90-1.04)      | 0.97 (0.90-1.04)                   | 0.90 (0.87-1.06)      | 1.03 90.98-1.08)              | 0.93 (0.81-1.02)        |

Bold text indicates significance. Abbreviations: CI: Confidence interval; CoH: Cost of hospitalization per admission; GMP: General medical population; LoS: Length of stay; OR: Odds ratio.

\* Adjusted for sex, race, and comorbidities (acute kidney injury, congestive heart failure, anemia, chronic lung disease, alcohol abuse, coagulopathy, metastatic cancer, cancer with solid tumors, diabetes [uncomplicated], diabetes [complicated])
